# Supplementary material for: Facile and ecofriendly green synthesis of Co3O4/MgO–SiO2 composites towards efficient asymmetric supercapacitor and oxygen evolution reaction applications
Source: Royal Society of Chemistry journal article supplement (doi:10.1039/d4ra07337a), 2024-01-01
Supplement: d4ra07337a1.pdf [file d4ra07337a1.pdf]

## Supplementary Information

### Facile and ecofriendly green Synthesis of $\text{Co}_3\text{O}_4/\text{MgO-SiO}_2$ Composites towards efficient asymmetric supercapacitor and oxygen evolution reaction applications

Gulzar Ali<sup>1</sup>, Aneela Tahira<sup>2</sup>, Asma Hayat<sup>1</sup>, Muhammad Ali Bhatti<sup>3</sup>, Aqeel Ahmed Shah<sup>4</sup>, Syed Nizam Uddin Shah Bukhari<sup>5</sup>, Elmuez Dawi<sup>6</sup>, Ayman Nafady<sup>7</sup>, Riyadh H. Alshammari<sup>7</sup>, Matteo Tonezzer<sup>8</sup>, Muhammad Kashif Samoon<sup>9</sup>, Zafar Hussain Ibupoto<sup>\*1</sup>

<sup>1</sup>Institute of Chemistry, University of Sindh, Jamshoro 76080, Pakistan.  
[gulzaralichemist@gmail.com](mailto:gulzaralichemist@gmail.com) ; [asmabaloch141617@gmail.com](mailto:asmabaloch141617@gmail.com) ; [zaffar.ibhupoto@usindh.edu.pk](mailto:zaffar.ibhupoto@usindh.edu.pk)

<sup>2</sup>Institute of Chemistry, Shah Abdul Latif University Khairpur Mirs, Sindh, Pakistan.  
[aneela.tahira@salu.edu.pk](mailto:aneela.tahira@salu.edu.pk)

<sup>3</sup>Centre for Environmental Sciences, University of Sindh Jamshoro, 76080, Sindh, Pakistan.  
[mali.bhatti@usindh.edu.pk](mailto:mali.bhatti@usindh.edu.pk)

<sup>4</sup>Wet Chemistry Laboratory, Department of Metallurgical Engineering, NED University of Engineering and Technology, University Road, Karachi 75270, Pakistan.  
[aqeelshah@cloud.neduet.edu.pk](mailto:aqeelshah@cloud.neduet.edu.pk)

<sup>5</sup>Department of Basic Science and Humanities, Dawood University of Engineering and Technology, Karachi, Sindh, 74800 Pakistan. [nizamuddin@duet.edu.pk](mailto:nizamuddin@duet.edu.pk)

<sup>6</sup>College of Humanities and Sciences, Department of Mathematics and Sciences, Ajman University, P.O. Box 346, Ajman, UAE. [e.dawi@ajman.ac.ae](mailto:e.dawi@ajman.ac.ae)

<sup>7</sup>Chemistry Department, College of Science, King Saud University, Riyadh, 11451, Saudi Arabia. [anafady@ksu.edu.sa](mailto:anafady@ksu.edu.sa) ; [ralshammari@ksu.edu.sa](mailto:ralshammari@ksu.edu.sa)

<sup>8</sup>Department of Chemical and Geological Sciences, University of Cagliari, Monserrato, Italy.  
[matteo.tonezzer@cnr.it](mailto:matteo.tonezzer@cnr.it)

<sup>9</sup>Centre for Pure and Applied Geology, University of Sindh Jamshoro, Jamshoro, Sindh, 76080, Pakistan. [kashif.samoon@usindh.edu.pk](mailto:kashif.samoon@usindh.edu.pk)

\*Corresponding author(s):  
Zafar Hussain Ibupoto, PhD, Email: [zaffar.ibhupoto@usindh.edu.pk](mailto:zaffar.ibhupoto@usindh.edu.pk)

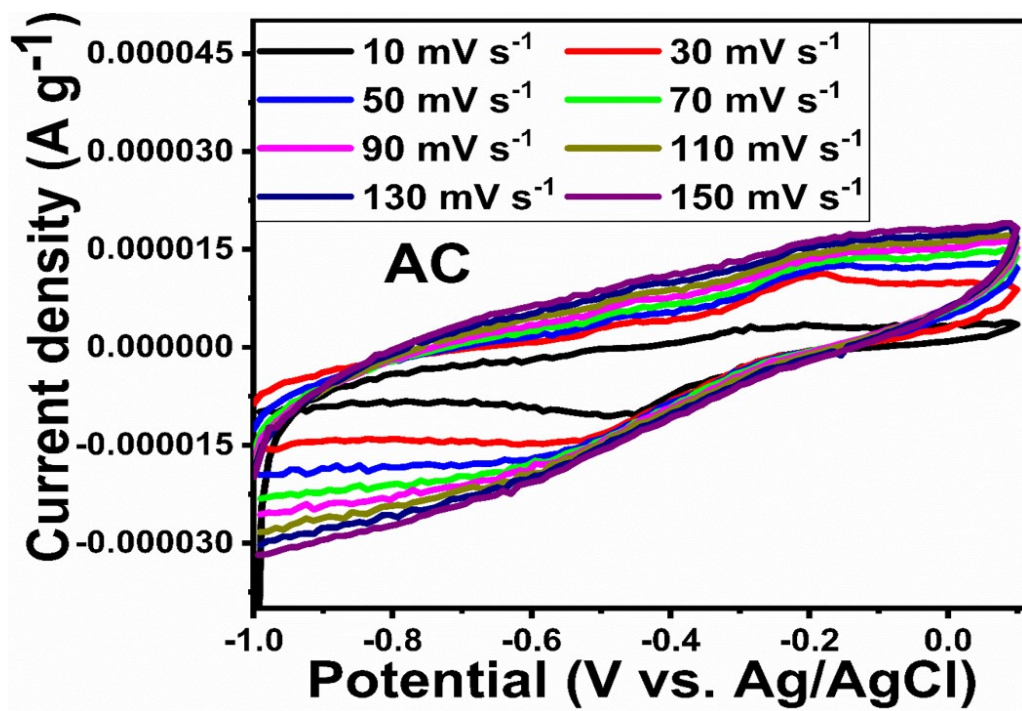

**Figure (S1):** CV curves of rice husk derived activated carbon (Ac) at various scan rates in 1M KOH aqueous solution.

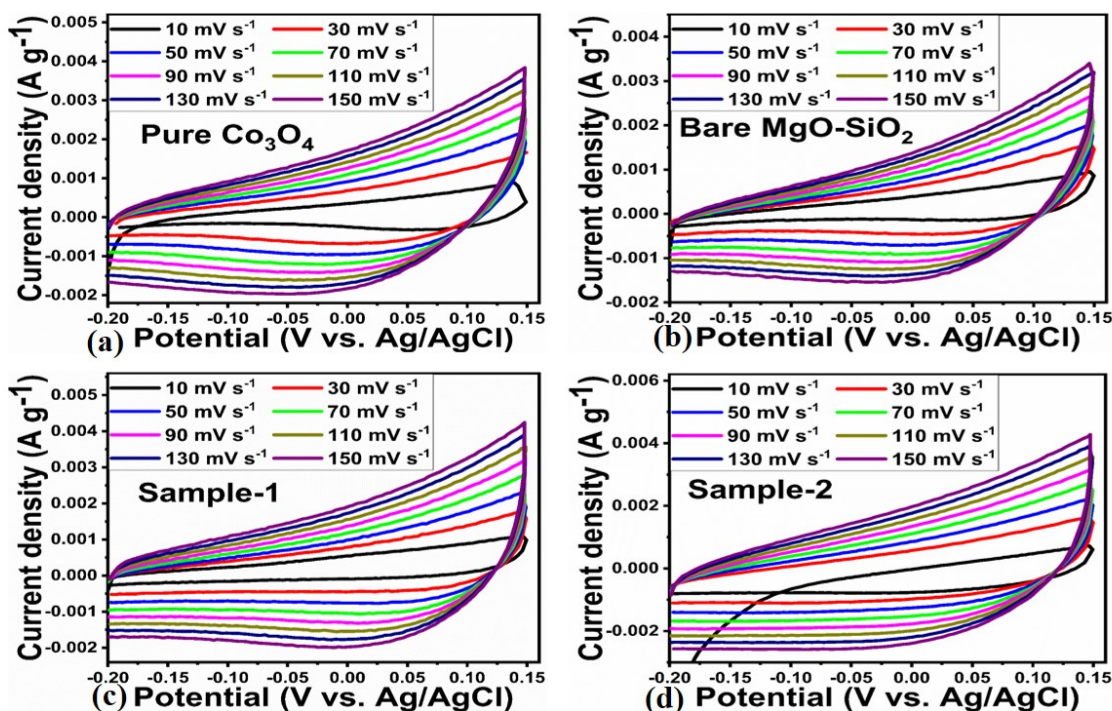

**Figure (S2):** CV curves at various scan rates in 1M KOH aqueous solution (a) pure  $\text{Co}_3\text{O}_4$ , (b) bare  $\text{MgO-SiO}_2$ , (c)  $\text{Co}_3\text{O}_4/\text{MgO-SiO}_2$  composite (sample1), (d)  $\text{Co}_3\text{O}_4/\text{MgO-SiO}_2$  composite (sample 2).

**Table (S1):** Comparative analysis of presented supercapacitor based on  $\text{Co}_3\text{O}_4/\text{MgO-SiO}_2$  composite (sample 2).

| Material                                       | Specific Capacitance (F/g) | Current Density (A/g) | Potential Window (V) | Energy Density ( $\text{Wh kg}^{-1}$ ) | Power Density ( $\text{W kg}^{-1}$ ) | Reference |
|------------------------------------------------|----------------------------|-----------------------|----------------------|----------------------------------------|--------------------------------------|-----------|
| MWCNTs                                         | 84 F/g                     | 0.6 A/g               | -0.5 to 2.2 V        | 21                                     | 6237                                 | [35]      |
| Ni-Co-O-1                                      | 568 F/g                    | 20 A/g                | 0 to 0.5 V           | 19.72                                  | 5000                                 | [36]      |
| NiCo <sub>2</sub> O <sub>4</sub> (Lemon juice) | 358 F/g                    | 0.8 A/g               | 0 to 0.4 V           | 7.96                                   | 160                                  | [37]      |
| NiCo <sub>2</sub> O <sub>4</sub> (Grapefruit)  | 434 F/g                    | 0.8 A/g               | 0 to 0.4 V           | 9.64                                   | 160                                  | [38]      |
| NiCo <sub>2</sub> O <sub>4</sub> (OP-1)        | 997 F/g                    | 1.5 A/g               | 0 to 0.4 V           | 22.17                                  | 300                                  | [39]      |

|                                            |                       |                                  |                       |              |               |                  |
|--------------------------------------------|-----------------------|----------------------------------|-----------------------|--------------|---------------|------------------|
| Sample 1<br>Co <sub>3</sub> O <sub>4</sub> | 867 F g <sup>-1</sup> | 1.5 Ag <sup>-</sup> <sub>1</sub> | 0 to 0.4<br>V         | 18.41        | 239.25        | [40]             |
| Co <sub>3</sub> O <sub>4</sub>             | 699 F g <sup>-1</sup> | 0.8 A<br>g <sup>-1</sup>         | 0 to 0.4<br>V         | 30           | 236           | [41]             |
| MnO/FLG                                    | 778.5                 | 0.5 A<br>g <sup>-1</sup>         | 0 to 1 V              | 81           | 292           | [42]             |
| CoNi-alloy                                 | 132 Fg <sup>-1</sup>  | 1 Ag <sup>-</sup>                | 0 to 1 V              | 4.60         | 250           | [43]             |
| S, N-FLG                                   | 298 F g <sup>-1</sup> | 1 A g <sup>-1</sup>              | 0 to -0.6             | 15           | 298           | [44]             |
| <b>Sample-2</b>                            | <b>1147.98</b>        | <b>2 A/g</b>                     | <b>0 to 0.4<br/>V</b> | <b>25.00</b> | <b>396.00</b> | <b>This Work</b> |

**Table (S2):** OER comparative study of Co<sub>3</sub>O<sub>4</sub>/MgO-SiO<sub>2</sub> composite (sample 2).

| <b>Catalyst</b>                                                    | <b>Over potential (mV)<br/>@ 10 mA/cm<sup>2</sup></b> | <b>Electrolyte</b> | <b>References</b> |
|--------------------------------------------------------------------|-------------------------------------------------------|--------------------|-------------------|
| CoS <sub>x</sub> /MoS <sub>2</sub>                                 | 347                                                   | 1.0 M KOH          | [45]              |
| MOF derived-NiCo <sub>2</sub> O <sub>4</sub> /<br>NiO              | 430                                                   | 1.0 M KOH          | [46]              |
| NiCo <sub>2</sub> O <sub>4</sub> /NiO                              | 360                                                   | 1.0 M KOH          | [47]              |
| NiCo <sub>2</sub> O <sub>4</sub> @Graphene<br>nanosheets           | 383                                                   | 1.0 M KOH          | [48]              |
| NiCo <sub>2</sub> O <sub>4</sub> @NiCo <sub>2</sub> O <sub>4</sub> | 440                                                   | 1.0 M KOH          | [49]              |
| NiCo film                                                          | 422                                                   | 0.5 M KOH          | [50]              |
| <b>Sample-2</b>                                                    | <b>340</b>                                            | <b>1.0 M KOH</b>   | <b>This Work</b>  |
